# Supplementary material for: Alterations of specific cortical GABAergic circuits underlie abnormal network activity in a mouse model of Down syndrome
Source: eLife. 2020 Aug 12;9:e58731. doi: 10.7554/eLife.58731 (PMC7481006; doi:10.7554/eLife.58731)
Supplement: Figure 1—figure supplement 2—source data 1. [file elife-58731-fig1-figsupp2-data1.xlsx]

## Sheet: Sheet1
Rise tau (ms)			Decay tau (ms)
Euploid	Ts65Dn		Euploid	Ts65Dn
1.56	3		13.2	23.2
0.9	3.2		10.9	30.1
2.5	2.6		16.9	7.8
1.9	1.7		14.1	16.9
2.2	2		19.2	20.9
0.84	1.5		24.3	16.5
1.2	1.5		19.6	9.8
0.96	1.2		8.7	22
0.9	1.9		9.9	27
1	3.3		16	22.8
1.6	1		23.6	14.4
2.2	1.3		9.7	17.7
1.2	1.9		7.4	14.9
0.95	1.6		21.7	19.6
1.31	1.5		10.1	17.4
1.3	1.7		5.33	16.7
1.1	1.6		26.5	13.7
2.6	2.1		15.6	15.4
