# Supplementary material for: Alterations of specific cortical GABAergic circuits underlie abnormal network activity in a mouse model of Down syndrome
Source: eLife. 2020 Aug 12;9:e58731. doi: 10.7554/eLife.58731 (PMC7481006; doi:10.7554/eLife.58731)
Supplement: Figure 1—figure supplement 3—source data 1. [file elife-58731-fig1-figsupp3-data1.xlsx]

## Sheet: STP
		Normalized Amplitude		Failure Rate
	MC to PN	Eu (n=11)	Ts (n=17)	Eu (n=11)	Ts (n=17)
		1 ± 0	1 ± 0	0.37 ± 0.06	0.12 ± 0.04
		0.49 ± 0.06	0.26 ± 0.05	0.7 ± 0.05	0.5 ± 0.06
		0.48 ± 0.09	0.19 ± 0.04	0.74 ± 0.04	0.55 ± 0.06
		0.38 ± 0.04	0.22 ± 0.04	0.75 ± 0.04	0.56 ± 0.05
		0.37 ± 0.04	0.22 ± 0.04	0.76 ± 0.05	0.58 ± 0.05
	PN to MC	Eu (n=7)	Ts (n=6)	Eu (n=7)	Ts (n=6)
		1 ± 0	1 ± 0	0.87 ± 0.03	0.52 ± 0.12
		1.49 ± 0.43	1.33 ± 0.33	0.81 ± 0.07	0.43 ± 0.13
		2.13 ± 0.57	2.01 ± 0.63	0.7 ± 0.09	0.35 ± 0.14
		2.35 ± 0.54	1.91 ± 0.58	0.69 ± 0.06	0.28 ± 0.15
		2.65 ± 0.65	2.32 ± 0.94	0.66 ± 0.78	0.28 ± 0.16
