# Supplementary material for: Alterations of specific cortical GABAergic circuits underlie abnormal network activity in a mouse model of Down syndrome
Source: eLife. 2020 Aug 12;9:e58731. doi: 10.7554/eLife.58731 (PMC7481006; doi:10.7554/eLife.58731)
Supplement: Figure 1—source data 1. [file elife-58731-fig1-data1.xlsx]

## Sheet: PV-PN IPSC ind values
	uIPSC amps			uIPSC failure rate			uIPSC Q
	Eu	Ts		Eu	Ts		Eu	Ts
	33.77	59.5798		0.04	0		0.72225	1.6993
	66.2432	198.405		0	0		1.79068	6.19304
	540.41	214.372		0	0		7.81048	5.18578
	262.586	13.9503		0	0.56667		2.6984	1.97581
	132.726	44.1825		0	0		2.0222	2.23112
	291.415	376.615		0	0		8.35371	8.93154
	249.605	46.8236		0	0		4.74135	1.79666
	452.362	45.3672		0	0.16667		10.2029	1.61077
	281.855	669.146		0.03226	0		11.085	8.20733
	189.927	205.181		0	0		4.30131	5.50746
	186.937	90.0428		0	0		2.94585	3.7605
	934.309	144.518		0	0		10.4249	5.27468
	412.505	14.9328		0	0.3		5.08201	0.70651
	227.325	146.735		0	0		2.71812	4.88562
	191.547	731.116		0	0		3.70819	20.9627
	43.7915			0			1.28564
	78.8065			0.1			0.5685
	359.224			0			4.84395
	118.591			0			3.62144
	46.7112			0.3			1.22857
	123.477			0			2.72686
	32.2675			0.36667			1.88514
	13.3608			0.53333			0.70983
	85.0976			0.1			2.82088
	73.5595			0.03333			2.66222
	442.007			0			10.2506

## Sheet: PN-MC EPSC ind values
	uEPSC amp (pA)			uEPSC Failure Rates			uEPSC Q
	Eu	Ts		Eu	Ts		Eu	Ts
	2.24464	8.48902		0.8	0.6129		0.26812	0.55784
	9.58967	18.8469		0.86667	0.48649		0.32303	0.40184
	2.02401	8.25737		1	0.8		0.19464	1.09639
	1.79634	37.5812		0.95349	0.28571		0.13071	1.16137
	9.30421	14.3816		0.9	0.81481		0.3006	0.49251
	5.35785	60.2856		0.75	0.1		0.58942	1.82753
	5.62282	18.6611		0.8125	0.51613		0.23904	0.87166
