# Supplementary material for: Alterations of specific cortical GABAergic circuits underlie abnormal network activity in a mouse model of Down syndrome
Source: eLife. 2020 Aug 12;9:e58731. doi: 10.7554/eLife.58731 (PMC7481006; doi:10.7554/eLife.58731)
Supplement: Figure 2—figure supplement 1—source data 1. [file elife-58731-fig2-figsupp1-data1.xlsx]

## Sheet: Pyr passive prop
Vrest (mV)			Ri (Mohm)			Tau (ms)
Eu	Ts		Eu	Ts		Eu	Ts
-79.0053	-86.8464		391.221	67.9021		81.875	13.8186
-75.0981	-64.3002		398.68	91.8963		47.9143	39.8672
-79.999	-66.9656		316.743	97.4274		28.513	43.7606
-65.5553	-74.7526		274.536	102.987		36.5305	38.4232
-68.2898	-68.7089		255.381	140.429		35.8321	51.6507
-85.3014	-73.4599		138.764	73.2638		22.1773	39.9556
-75.7867	-71.0845		371.06	82.767		42.0008	46.8951
-74.0374	-73.0077		285.394	85.7184		44.5387	43.9701
-71.7935	-70.1939		166.212	75.9368		54.0115	15.0309
-62.214	-69.1976		75.5369	79.8399		75.8792	12.6339
-67.9231	-66.9734		208.244	321.87		36.9187	62.4983
-78.061	-79.0136		379.594	332.436		33.5642	33.993
-78.4139	-66.0539		156.293	209.314		30.6332	34.1431
-80.245	-73.319		129.219	316.402		16.443	39.4716
-71.9048	-81.4864		393.804	189.073		41.2364	26.8346
-76.0647	-72.3831		405.19	369.189		43.2066	53.6874
-76.5168	-73.0651		295.383	192.281		49.9263	23.2292
-69.3025	-78.2805		605.24	283.287		63.21	43.8003
-77.0859	-78.1217		208.991	186.466		28.0826	26.3586
-81.8245	-79.4803		113.834	169.815		18.0493	32.7078
-78.5131	-71.7415		101.427	445.657		19.8789	65.3113
-82.1218	-70.2746		101.258	364.799		15.3847	56.5928
-69.8427			138.148			23.9412
-76.2953			377.779			54.4961
-74.5489			209.226			28.7793

## Sheet: Pyr AP prop
AP Amplitude (mV)			AP threshold (Mohm)			AP width (ms)
Eu	Ts		Eu	Ts		Eu	Ts
84.4971	86.9873		-51.4465	-44.1467		1.46422	0.96345
89.6545	72.7753		-46.3013	-40.0665		1.06548	1.47368
94.4214	64.743		-46.7773	-36.2854		0.88392	1.63096
69.3542	84.024		-40.0208	-37.8052		2.41882	1.08059
75.1343	82.4829		-42.9382	-38.5498		1.39975	1.05836
76.062	88.1927		-40.4358	-43.4296		1.40112	1.34711
83.5693	85.8032		-45.05	-39.859		1.00124	0.96732
72.2961	89.6149		-42.7734	-42.8345		1.5688	1.20054
87.5183	67.4194		-48.7427	-38.7543		1.09045	1.96329
84.6497	85.4584		-46.8079	-39.5569		1.56545	0.96993
83.2489	83.2428		-38.6963	-38.3698		1.02098	1.24982
84.6008	76.5961		-39.2181	-39.1174		1.04811	1.35871
82.1869	90.329		-38.1195	-45.0592		1.09732	1.09452
69.8883	92.9108		-38.913	-43.8507		2.23348	0.96349
87.8326	71.4569		-40.2985	-40.7562		1.2185	1.64919
64.9567	51.6663		-36.0413	-36.2305		2.52105	3.51954
81.2134	63.1622		-41.2659	-39.4073		1.16213	2.72493
90.332	53.3112		-40.8905	-38.7543		0.90029	3.47952
83.5724	85.0891		-39.9933	-41.0858		1.03928	0.88725
71.5118	69.2322		-45.6299	-36.1389		1.79409	1.60313
85.7788	83.6578		-37.6923	-37.9822		0.94193	1.16391
82.6508	79.2114		-39.7827	-39.0411		1.18387	1.02564
84.9426	83.7799		-41.1652	-40.3503		1.06431	0.96584
	81.8848			-39.9109			1.05403
	69.2108			-40.4633			1.80431

## Sheet: MC passive prop
Vrest (mV)			Ri (Mohm)			Tau (ms)
Eu	Ts		Eu	Ts		Eu	Ts
-60.1266	-64.7597		185.243	275.951			29.7987
-62.7355	-73.7961		123.323	732.881		39.3347	29.0617
-65.2433	-69.9748		239.957	872.902		29.6574	62.917
-72.7394	-62.7946		176.89	288.615		22.4223	27.3956
-59.2477	-68.2788		375.857	792.02		36.5498	72.3318
-63.45	-66.8818		295.397	777.926		27.0114	59.3707
-62.8912	-65.7518		147.897	265.687		10.8863	55.3234
-71.8448	-65.5267		213.954	215.111		16.1366	48.0307
-66.587	-69.0965		166.426	218.85		17.7894	35.8961
-73.1279	-59.4287		236.468	181.803		25.0552	27.6993
-63.1193	-62.1585		141.181	195.113		15.9883	30.5582
-62.2537	-63.7354		183.192	175.063		22.398	55.4333
-70.4092	-64.7484		540.905	184.192		94.7898	32.6504
-64.3776	-49.9577		434.426	143.964		77.9546	42.3751
-71.0931	-61.5163		804.252	233.54		63.633	41.1481
-66.224	-61.5084		409.618	175.473		56.5822	31.6545
-65.7523	-66.6163		568.391	146.5		62.5508	17.1885
-70.8478	-61.6554		169.743	163.29		18.3538	28.2951
-68.6245	-59.3294		260.458	198.761		23.1293	33.3408
-61.9346	-54.2173		382.261	177.435		23.7425	26.8141
-65.2545			271.4			40.5844
-62.0518			357.9			37.1775
-69.8383			191.007			24.3784
-68.0192			226.498			22.6602
-67.4461			231.799			41.412
-72.6139			484.221			42.2426

## Sheet: MC AP prop
AP Amplitude (mV)			AP threshold (Mohm)			AP width (ms)
Eu	Ts		Eu	Ts		Eu	Ts
62.7075	68.8904		-48.0774	-42.5476		1.09927	1.35056
58.7463	85.3516		-39.1907	-47.3755		1.1753	2.29656
63.1653	81.3782		-43.0786	-41.9556		1.47268	1.839
54.2969	90.509		-39.2578	-45.3369		1.73666	1.3797
82.605	80.6519		-48.4924	-45.5566		1.27354	1.72997
77.6428	60.5896		-42.6392	-38.385		0.97555	3.80929
70.2759	65.3992		-30.5786	-23.1934		0.8164	1.69333
88.4705	86.7615		-51.7578	-43.335		0.68861	0.81856
91.6138	85.2051		-48.3093	-42.8162		0.71652	0.80242
85.083	81.5735		-54.4128	-44.7388		0.9098	0.88159
85.022	78.1555		-51.8494	-44.4336		0.75391	0.9056
86.792	87.6465		-51.9409	-43.0603		0.89109	0.98062
91.4734	67.5354		-51.5137	-38.324		1.33865	1.26808
65.0635	80.4138		-42.218	-40.3748		2.19451	1.23655
85.2478	76.4771		-44.8303	-42.0837		1.62668	1.04667
78.5828	85.6018		-42.4988	-43.3044		1.9699	0.82306
79.8523	111.328		-45.6543	-67.2607		1.52559	1.16018
53.8574	95.7336		-35.7788	-43.3044		1.00718	1.05166
86.7615	89.2639		-42.1661	-42.6941		1.61117	1.14833
84.3048	91.2781		-46.1395	-42.0532		0.7506	1.02919
61.9965			-45.9747			1.29536
70.2087			-50.0885			1.58033
82.6385			-52.5818			1.10313
74.5758			-41.6931			1.15064
57.6752			-41.3452			1.69244
79.4983			-53.3325			1.14891
