# Supplementary material for: Alterations of specific cortical GABAergic circuits underlie abnormal network activity in a mouse model of Down syndrome
Source: eLife. 2020 Aug 12;9:e58731. doi: 10.7554/eLife.58731 (PMC7481006; doi:10.7554/eLife.58731)
Supplement: Figure 2—figure supplement 2—source data 1. [file elife-58731-fig2-figsupp2-data1.xlsx]

## Sheet: MC passive prop
Vrest (mV)			Ri (Mohm)			Tau (ms)
Eu	Ts		Eu	Ts		Eu	Ts
-60.1266	-64.7597		185.243	275.951			29.7987
-62.7355	-73.7961		123.323	732.881		39.3347	29.0617
-65.2433	-69.9748		239.957	872.902		29.6574	62.917
-72.7394	-62.7946		176.89	288.615		22.4223	27.3956
-59.2477	-68.2788		375.857	792.02		36.5498	72.3318
-63.45	-66.8818		295.397	777.926		27.0114	59.3707
-62.8912	-65.7518		147.897	265.687		10.8863	55.3234
-71.8448	-65.5267		213.954	215.111		16.1366	48.0307
-66.587	-69.0965		166.426	218.85		17.7894	35.8961
-73.1279	-59.4287		236.468	181.803		25.0552	27.6993
-63.1193	-62.1585		141.181	195.113		15.9883	30.5582
-62.2537	-63.7354		183.192	175.063		22.398	55.4333
-70.4092	-64.7484		540.905	184.192		94.7898	32.6504
-64.3776	-49.9577		434.426	143.964		77.9546	42.3751
-71.0931	-61.5163		804.252	233.54		63.633	41.1481
-66.224	-61.5084		409.618	175.473		56.5822	31.6545
-65.7523	-66.6163		568.391	146.5		62.5508	17.1885
-70.8478	-61.6554		169.743	163.29		18.3538	28.2951
-68.6245	-59.3294		260.458	198.761		23.1293	33.3408
-61.9346	-54.2173		382.261	177.435		23.7425	26.8141
-65.2545			271.4			40.5844
-62.0518			357.9			37.1775
-69.8383			191.007			24.3784
-68.0192			226.498			22.6602
-67.4461			231.799			41.412
-72.6139			484.221			42.2426

## Sheet: MC AP prop
AP Amplitude (mV)			AP threshold (Mohm)			AP width (ms)
Eu	Ts		Eu	Ts		Eu	Ts
62.7075	68.8904		-48.0774	-42.5476		1.09927	1.35056
58.7463	85.3516		-39.1907	-47.3755		1.1753	2.29656
63.1653	81.3782		-43.0786	-41.9556		1.47268	1.839
54.2969	90.509		-39.2578	-45.3369		1.73666	1.3797
82.605	80.6519		-48.4924	-45.5566		1.27354	1.72997
77.6428	60.5896		-42.6392	-38.385		0.97555	3.80929
70.2759	65.3992		-30.5786	-23.1934		0.8164	1.69333
88.4705	86.7615		-51.7578	-43.335		0.68861	0.81856
91.6138	85.2051		-48.3093	-42.8162		0.71652	0.80242
85.083	81.5735		-54.4128	-44.7388		0.9098	0.88159
85.022	78.1555		-51.8494	-44.4336		0.75391	0.9056
86.792	87.6465		-51.9409	-43.0603		0.89109	0.98062
91.4734	67.5354		-51.5137	-38.324		1.33865	1.26808
65.0635	80.4138		-42.218	-40.3748		2.19451	1.23655
85.2478	76.4771		-44.8303	-42.0837		1.62668	1.04667
78.5828	85.6018		-42.4988	-43.3044		1.9699	0.82306
79.8523	111.328		-45.6543	-67.2607		1.52559	1.16018
53.8574	95.7336		-35.7788	-43.3044		1.00718	1.05166
86.7615	89.2639		-42.1661	-42.6941		1.61117	1.14833
84.3048	91.2781		-46.1395	-42.0532		0.7506	1.02919
61.9965			-45.9747			1.29536
70.2087			-50.0885			1.58033
82.6385			-52.5818			1.10313
74.5758			-41.6931			1.15064
57.6752			-41.3452			1.69244
79.4983			-53.3325			1.14891
