# Supplementary material for: Alterations of specific cortical GABAergic circuits underlie abnormal network activity in a mouse model of Down syndrome
Source: eLife. 2020 Aug 12;9:e58731. doi: 10.7554/eLife.58731 (PMC7481006; doi:10.7554/eLife.58731)
Supplement: Figure 2—source data 1. [file elife-58731-fig2-data1.xlsx]

## Sheet: Figure 2
Basal Dend Length (µm)			Apical Dend Length (µm)			Cell density (cells/mm^2)
Eu	Ts		Eu	Ts		Eu	Ts
1091.81	474.64		771.47	581.64		47.1433	49.4597
2532.4	1984.51		401.59	1624.41		24.3588	33.1453
1400.09	941.4		1794.67	618.7		24.9465	13.9968
1767.34	680.91		2124.74	1078.93		15.0302	18.4138
1297.42	1793.24		742.1	661.43		30.7867	7.72319
515.24	1802.68		889.31	1188.2		30.7867	7.72319
985.84	1248.01		2223.27	424.2
3057.87	1762.95		1836.08	436.11
731.2	688.4		1345.65	2163.01
1125.58	1135.09		433.43	1212.33
1539.51	2666.13		1750.31	2138.66
1128.49	1165.33		1811.88	1215.05
1618.96	1293.42		786.68	1149.02
1595.02			2694.49
