# Supplementary material for: Alterations of specific cortical GABAergic circuits underlie abnormal network activity in a mouse model of Down syndrome
Source: eLife. 2020 Aug 12;9:e58731. doi: 10.7554/eLife.58731 (PMC7481006; doi:10.7554/eLife.58731)
Supplement: Figure 3—figure supplement 1—source data 1. [file elife-58731-fig3-figsupp1-data1.xlsx]

## Sheet: STP
		Normalized Amplitude		Failure Rate
	PV to PN	Eu (n=26)	Ts (n=8)	Eu (n=26)	Ts (n=8)
		1 ± 0	1 ± 0	0.06 ± 0.27	0.09 ± 0.07
		0.61 ± 0.04	0.73 ± 0.05	0.11 ± 0.31	0.18 ± 0.07
		0.48 ± 0.03	0.62 ± 0.09	0.15 ± 0.04	0.18 ± 0.06
		0.42 ± 0.04	0.52 ± 0.07	0.2 ± 0.04	0.27 ± 0.07
		0.37 ± 0.04	0.47 ± 0.05	0.21 ± 0.04	0.26 ± 0.08
	PN to PV	Eu (n=15)	Ts (n=9)	Eu (n=15)	Ts (n=9)
		1 ± 0	1 ± 0	0.21 ± 0.07	0.34 ± 0.12
		0.46 ± 0.05	0.63 ± 0.11	0.36 ± 0.09	0.46 ± 0.13
		0.39 ± 0.06	0.6 ± 0.13	0.47 ± 0.09	0.6 ± 0.12
		0.34 ± 0.05	0.55 ± 0.1	0.48 ± 0.09	0.62 ± 0.12
		0.32 ± 0.05	0.5 ± 0.11	0.47 ± 0.09	0.65 ± 0.11
