# Supplementary material for: Alterations of specific cortical GABAergic circuits underlie abnormal network activity in a mouse model of Down syndrome
Source: eLife. 2020 Aug 12;9:e58731. doi: 10.7554/eLife.58731 (PMC7481006; doi:10.7554/eLife.58731)
Supplement: Figure 3—source data 1. [file elife-58731-fig3-data1.xlsx]

## Sheet: PV-PN IPSC ind values
	uIPSC amps			uIPSC failure rate			uIPSC Q
	Eu	Ts		Eu	Ts		Eu	Ts
	33.77	59.5798		0.04	0		0.72225	1.6993
	66.2432	198.405		0	0		1.79068	6.19304
	540.41	214.372		0	0		7.81048	5.18578
	262.586	13.9503		0	0.56667		2.6984	1.97581
	132.726	44.1825		0	0		2.0222	2.23112
	291.415	376.615		0	0		8.35371	8.93154
	249.605	46.8236		0	0		4.74135	1.79666
	452.362	45.3672		0	0.16667		10.2029	1.61077
	281.855	669.146		0.03226	0		11.085	8.20733
	189.927	205.181		0	0		4.30131	5.50746
	186.937	90.0428		0	0		2.94585	3.7605
	934.309	144.518		0	0		10.4249	5.27468
	412.505	14.9328		0	0.3		5.08201	0.70651
	227.325	146.735		0	0		2.71812	4.88562
	191.547	731.116		0	0		3.70819	20.9627
	43.7915			0			1.28564
	78.8065			0.1			0.5685
	359.224			0			4.84395
	118.591			0			3.62144
	46.7112			0.3			1.22857
	123.477			0			2.72686
	32.2675			0.36667			1.88514
	13.3608			0.53333			0.70983
	85.0976			0.1			2.82088
	73.5595			0.03333			2.66222
	442.007			0			10.2506

## Sheet: PN-PV EPSC ind values
	uEPSC amps			uEPSC failure rate			uEPSC Q
	Eu	Ts		Eu	Ts		Eu	Ts
	129.147	8.82042		0	0.56667		1.01045	0.10346
	190.849	14.1005		0	0.35		1.35433	0.548
	65.6588	84.2519		0	0		0.78894	0.499
	119.849	36.349		0	0.13333		0.59844	0.20334
	10.1519	152.538		0.72	0		0.26152	4.02547
	11.2257	5.98819		0.48	0.8		0.0503	-0.06451
	189.395	20.405		0	0.1		1.1912	0.41874
	80.0861	119.962		0	0		0.65753	1.48061
	56.5195	14.8112		0	0.66667		0.61646	0.27408
	22.1484			0.16667			0.32439
	12.813			0.43333			0.19313
	48.6422			0.0625			0.50538
	112.1			0			0.69929
	16.4028			0.36667			0.23186
	352.865			0			3.54094
