# Supplementary material for: Alterations of specific cortical GABAergic circuits underlie abnormal network activity in a mouse model of Down syndrome
Source: eLife. 2020 Aug 12;9:e58731. doi: 10.7554/eLife.58731 (PMC7481006; doi:10.7554/eLife.58731)
Supplement: Figure 4—figure supplement 1—source data 1. [file elife-58731-fig4-figsupp1-data1.xlsx]

## Sheet: PV passive prop & excitability
Vrest (mV)			Tau (ms)			AP Amplitude (mV)			AP threshold (Mohm)
Eu	Ts		Eu	Ts		Eu	Ts		Eu	Ts
-74.2045	-69.712		6.61643	47.7343		68.6676	82.5073		-42.5293	-43.7775
-73.6421	-65.6195		11.1092	25.7684		57.5897	66.4124		-45.2545	-44.0643
-69.9743	-67.6497		11.3958	34.4723		71.7041	71.7499		-46.3501	-44.7693
-70.0081	-69.2244		5.79738	22.3043		70.3308	71.0449		-44.7449	-44.2902
-70.8094	-68.3946		5.63019	25.5158		64.566	79.8187		-47.0215	-44.0155
-57.9796	-56.9815		23.5947	13.7083		72.7448	79.9957		-37.2131	-41.2903
-68.673	-76.2187		5.92919	43.5755		67.9596	72.8699		-42.2394	-49.8016
-73.6284	-71.3275		6.46712	44.3782		50.4486	45.6421		-49.53	-48.3887
-72.9013	-71.3275		8.18596	40.0477		70.0317	69.1284		-56.6254	-40.5334
-71.3947	-67.7499		17.279	71.6109		48.0835	69.0094		-39.4989	-40.0238
-68.928	-68.4411		30.7037	21.5948		43.4906	62.8998		-30.3741	-44.7601
-59.7983	-64.6135		18.3587	32.8025		54.6021	59.5337		-36.3251	-37.1185
-64.6789	-71.2105		20.6463	20.927		58.5205	62.8052		-40.1917	-41.3513
-74.2652	-70.6329		23.8441	28.1688		92.6239	82.1533		-51.9043	-45.99
-74.9895	-70.9058		18.9568	22.7197		68.866	56.8115		-43.2129	-44.8853
-75.3747	-71.4203		20.3795	20.2211		74.0692	79.7028		-44.1681	-45.6024
-65.6163	-72.986		43.8731	17.83		77.5757	66.629		-42.2089	-46.6797
-70.9817	-73.7976		33.6042	32.6174		45.6238	67.0807		-26.6663	-47.1985
-80.7866	-73.6744		37.4464	27.7114		80.072	61.1176		-43.8873	-42.0929
-68.8208	-77.1592		12.3675	37.315		58.1848	85.6689		-47.8119	-47.7661
-56.9638	-62.7899		20.4897	8.68223		56.5491	53.0609		-48.2178	-32.1594
-70.7142	-77.9348		5.55144	43.5627		65.2161	70.8008		-43.2739	-49.2554
-69.4349	-61.5367		2.16174	19.4372		52.0935	73.3643		-43.4875	-38.4216
-77.8492	-70.7733		7.75484	10.9565		69.5496	66.6809		-34.4849	-42.1753
-79.6183	-56.7901		7.81834	10.4245		50.7202	62.0728		-50.6592	-42.9993
-78.3009	-64.2767		5.87311						-39.3372	-38.3606
-75.2539			17.0349
-74.2237			11.5995
