# Supplementary material for: Alterations of specific cortical GABAergic circuits underlie abnormal network activity in a mouse model of Down syndrome
Source: eLife. 2020 Aug 12;9:e58731. doi: 10.7554/eLife.58731 (PMC7481006; doi:10.7554/eLife.58731)
Supplement: Figure 4—source data 1. [file elife-58731-fig4-data1.xlsx]

## Sheet: PV FI
Ri (Mohm)			AP width (ms)			Rheobase (pA)			Gain (pA)			Rate Max (Hz)			Cell density (cells/mm^2)
Eu	Ts		Eu	Ts		Eu	Ts		Eu	Ts		Eu	Ts		Eu	Ts
105.279	615.811		0.78613	1.07293		319.503	81.437		235.245	75.0882		138.019	45.8005		35.9575	33.9083
187.948	299.822		0.9105	1.10465		122.356	40.7721		173.059	25.2759		113.962	103.068		43.7469	32.3477
122.505	402.956		0.71865	1.61354		253.621	65.2764		141.66	29.5897		99.8015	60.2987		44.6076	32.4321
81.5819	264.368		0.59645	1.7002		321.981	46.1691		284.658	27.619		161.87	46.6306		87.7895	63.9716
82.2917	317.633		0.59981	1.20191		189.334	289.049		28.565	140.152		176.185	36.5817		74.2389	39.2956
155.989	659.313		0.76497	1.00224		302.4	31.7027		235.136	20.7746		30.5447	55.6595		86	96
87.5556	142.27		0.66407	0.94162		281.072	9.20497		232.559	10.1194		154.231	119.458			97
102.069	580.977		0.87304	1.68674		167.559	26.7159		163.168	21.6512		154.479	61.7131
122.399	560.955		0.70459	1.67297		116.965	43.6996		104.475	19.3584		149.112	45.2917
159.099	446.739		0.78185	1.55807		45.6323	22.575		14.9396	21.4838		99.2346	46.8862
347.659	542.3		1.61108	1.78612		60.8435	46.8323		28.991	31.4257		35.9802	47.5603
188.176	386.318		1.28045	1.47478		65.0415	54.962		29.7969	31.5342		46.9644	58.4018
260.901	503.503		1.3158	1.48401		91.1888	25.5418		39.472	19.9463		45.1925	36.1074
282.116	187.425		0.8448	1.23796		62.4076	135.862		24.936	73.8802		24.6518	39.1924
225.842	601.692		1.31582	1.61044		272.406	62.6579		344.582	17.55		48.8635	48.0435
314.086	622.603		1.01137	0.97508		321.8	117.495		255.86	96.0457		31.6619	55.724
581.823	409.107		0.97501	1.3849		250.847	10.8734		155.608	13.3073		80.1849	65.9576
764.682	283.49		3.06443	1.29501		198.735	91.2129		166.555	12.7041		35.6741	47.7561
807.534	546.405		1.59992	1.44877		259.149	16.9953		206.515	15.2396		49.1731	47.7678
152.876	391.98		1.67302	0.92718			236.864			157.311		177.623	32.2378
281.805	680.802		0.55264	1.60045			53.8316			28.7314		142.268	63.2826
163.79	141.206		0.62139	0.64614			275.981			199		100.686	82.1386
67.9907	612.492		0.62366	0.83575			73.8212			22.7816		70.9638	19
78.96	182.388		0.65391	1.89827			49.8409			36.4778		7.05236	39.4754
98.7119	110.061		0.59003	0.69837			199.815			34.4555		134.818	97.8439
58.51	194.018		0.68436	0.89871			101.218			46.7926		116.321	110.585
102.27
79.6941
