# Supplementary material for: Alterations of specific cortical GABAergic circuits underlie abnormal network activity in a mouse model of Down syndrome
Source: eLife. 2020 Aug 12;9:e58731. doi: 10.7554/eLife.58731 (PMC7481006; doi:10.7554/eLife.58731)
Supplement: Figure 5—source data 1. [file elife-58731-fig5-data1.xlsx]

## Sheet: Population data
			Euploid				Ts65Dn
			median	Q1	Q3	n	median	Q1	Q3	n	test	p value
		Spiking Rate (Hz)	0.8125	0.557497	1.23792	28	0.415	0.22	0.9175	23	MW-test	0.0348
		stLFP peak-to-peak Amplitude (µV)	7.33971	5.98518	8.57715	22	13.2781	12.2618	17.0666	11	MW-test	0.0011
	PPC	4-10 Hz	0.00850408	0.0053421	0.0241963	22	0.0105893	0.00641965	0.0164358	11	MW-test	0.427
		10-20 Hz	0.00464681	0.0010873	0.0237119	22	0.0212892	0.0162596	0.0378892	11	MW-test	0.02145
		20-40 Hz	0.00240584	-0.000173997	0.0084538	22	0.00657194	0.00590195	0.0193252	11	MW-test	0.0418
		40-60 Hz	0.00092563	-0.000889154	0.00245038	22	0.00521909	0.00194065	0.0079037	11	MW-test	0.01638
		60-80 Hz	-0.000314167	-0.000702683	0.000423986	22	0.000120448	-0.000458744	0.000859615	11	MW-test	0.2308
		80-100 Hz	-0.000237669	-0.000937835	0.00126379	22	-0.000446507	-0.00080418	0.000181626	11	MW-test	0.3161

## Sheet: Spiking Rate Ind. values
	Spiking Rates			stLFP peak-to-peak
	Euploid	Ts65Dn		Euploid	Ts65Dn
	0.125	0.415		6.48343	22.692
	0.47333	0.59833		5.61218	12.6324
	0.13667	0.43		5.37804	11.5573
	0.075	0.29337		6.99942	39.5181
	2.28667	0.03167		8.18075	13.9596
	1.06167	2.72333		6.36405	13.2781
	1.39167	1.20833		8.05572	19.1076
	0.82667	3.025		4.89545	15.0255
	0.90833	1.11833		2.48079	13.0436
	0.525	0.27167		6.34712	9.0692
	0.71167	0.3		7.49522	11.8911
	0.56833	0.07333		14.2468
	1.58667	0.12333		7.18421
	0.79833	0.58833		5.24348
	0.61333	0.41667		7.56233
	0.985	0.17		7.8506
	2.05333	0.12667		32.9267
	1.14167	0.325		20.7867
	2.91333	0.27		14.9956
	1.18667	0.09333		11.6948
	0.69	1.105		5.86453
	0.70833	0.73		8.70928
	0.23667	1.245
	0.24167
	0.73333
	1.855
	2.04833
	0.96167

## Sheet: Peak-to-Peak Ind.Values
	stLFP peak-to-peak
	Euploid	Ts65Dn
	6.48343	22.692
	5.61218	12.6324
	5.37804	11.5573
	6.99942	39.5181
	8.18075	13.9596
	6.36405	13.2781
	8.05572	19.1076
	4.89545	15.0255
	2.48079	13.0436
	6.34712	9.0692
	7.49522	11.8911
	14.2468
	7.18421
	5.24348
	7.56233
	7.8506
	32.9267
	20.7867
	14.9956
	11.6948
	5.86453
	8.70928

## Sheet: PPC Ind values
	PPC 4-10Hz		PPC 10-20Hz		PPC 20-40Hz		PPC 40-60Hz		PPC 60-80Hz		PPC 80-100Hz
	Euploid	Ts65Dn	Euploid	Ts65Dn	Euploid	Ts65Dn	Euploid	Ts65Dn	Euploid	Ts65Dn	Euploid	Ts65Dn
	0.00850408	0.00153823	0.00126148	0.0233211	0.00358076	0.0208927	-0.00127968	0.00937809	0.011345	-0.00223436	0.000164391	0.00288856
	0.0550014	0.00890123	0.00464681	0.0391628	0.00477005	0.00332789	-0.00384297	0.000193384	-0.00337435	0.00026959	0.00367591	-0.00115661
	0.0501261	0.0105893	0.0109707	0.106075	-0.000458304	0.00588385	0.00199542	0.00781875	-0.000248011	-0.00128386	2.18965e-05	-0.0035244
	0.0684847	0.0141153	0.0015299	0.0977701	-0.00082885	0.0302538	0.00151303	0.00521909	-0.0010856	-0.000841457	-0.00121801	-0.000855164
	0.0288298	0.00338993	-0.000338136	0.0366156	-0.000402372	0.00657194	0.00291932	0.00798866	-0.000151085	0.000120448	-0.000487113	-0.000696292
	-0.000222597	0.0101521	-2.45592e-05	0.015062	5.43794e-05	0.00687919	0.00211952	0.00621917	-0.00052426	0.000408114	0.00121883	-0.000446507
	0.14785	0.017643	0.257423	0.0212892	0.099683	-0.00165547	0.0238731	0.013277	0.0265166	0.00131112	0.00905018	0.0024004
	0.000359366	0.00393806	0.000668596	0.00106108	-0.000690672	0.00644139	0.000869406	-0.000654338	-0.0001208	0.00215135	-0.00052713	-0.000216246
	0.0105574	0.0152286	0.00585463	0.0176843	0.000112326	0.0295667	0.00278125	0.00502904	-0.000733906	0.00273	-0.00134609	0.000407368
	0.00511275	0.0262896	0.0368789	0.0107763	0.0145646	0.00592006	0.00092563	-1.04311e-05	-0.000314167	-7.2065e-05	-7.93518e-05	-4.41157e-05
	0.0123946	0.0364962	0.0343656	0.0174572	0.0013115	0.0177576	-0.000878493	0.00368791	-0.000585716	-7.60318e-05	-0.000997128	-0.000753197
	0.00611717		0.0105552		0.00240584		-0.000612675		0.000988128		-0.00100592
	0.00833634		0.00193772		-0.000770316		-0.00270301		-0.00252095		0.00367627
	0.000865212		-0.00013958		0.00219165		-0.00223044		0.000315367		0.00130874
	0.0136025		0.0130583		-0.00279611		-0.00228504		0.00472603		-0.00216499
	0.00645282		0.0128536		0.00724703		-0.000899814		-0.000807707		-0.000878542
	0.00631697		0.000913128		0.00280154		0.00171974		-0.000654051		-0.000407499
	0.00416208		0.00449814		0.00966056		0.000330317		0.000599459		-0.00262487
	0.0578716		0.179633		0.0743662		0.0148353		-0.000482172		0.00750698
	0.00882715		0.0642774		0.015408		0.00169609		-0.00067146		0.00148215
	0.0195627		0.16771		0.0486657		0.00421224		-0.00122711		0.000865549
	0.00530517		-0.000260749		0.000370698		-0.000435511		0.000532605		-0.000447647
	0.00537902		0.00241395		0.00559914		0.0118745		-6.67955e-05		-0.000237669
