# Supplementary material for: Alterations of specific cortical GABAergic circuits underlie abnormal network activity in a mouse model of Down syndrome
Source: eLife journal article supplement (doi:10.7554/elife.58731), 2020-08-12
Supplement: supp [file elife_poa_e58731_Transparent_Reporting_File.pdf › elife_poa_e58731_Transparent_Reporting_File.pdf]

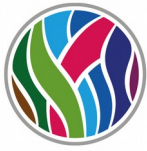

## **eLife's transparent reporting form**

We encourage authors to provide detailed information *within their submission* to facilitate the interpretation and replication of experiments. Authors can upload supporting documentation to indicate the use of appropriate reporting guidelines for health-related research (see [EQUATOR Network](#)), life science research (see the [BioSharing Information Resource](#)), or the [ARRIVE guidelines](#) for reporting work involving animal research. Where applicable, authors should refer to any relevant reporting standards documents in this form.

If you have any questions, please consult our Journal Policies and/or contact us: [editorial@elifesciences.org](mailto:editorial@elifesciences.org).

### **Sample-size estimation**

- You should state whether an appropriate sample size was computed when the study was being designed
- You should state the statistical method of sample size computation and any required assumptions
- If no explicit power analysis was used, you should describe how you decided what sample (replicate) size (number) to use

Please outline where this information can be found within the submission (e.g., sections or figure legends), or explain why this information doesn't apply to your submission:

No sample-size calculation was performed. All data were subject to statistical tests to decide whether parametric or nonparametric tests should be applied. Sample sizes were chosen depending on the type of experiment and the difficulty of obtaining good-quality recordings. Sample sizes were comparable to other published studies using similar approaches.

No data passing a quality control was excluded from the analysis. Recorded neurons were excluded from the analysis when series resistance exceeded 30 MOhm. No data was excluded from the analysis a posteriori.

All this is indicated in the Materials and Methods section of the paper.

### **Replicates**

- You should report how often each experiment was performed
- You should include a definition of biological versus technical replication
- The data obtained should be provided and sufficient information should be provided to indicate the number of independent biological and/or technical replicates
- If you encountered any outliers, you should describe how these were handled
- Criteria for exclusion/inclusion of data should be clearly stated

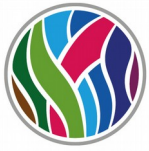

- High-throughput sequence data should be uploaded before submission, with a private link for reviewers provided (these are available from both GEO and ArrayExpress)

Please outline where this information can be found within the submission (e.g., sections or figure legends), or explain why this information doesn't apply to your submission:

Replication was ensured by repeating the experiments several times, interleaving different experimental conditions and treatments. In our hands, experimental protocols and results were reliably reproduced as it could be judged from the figures and associated statistics.

The number of neurons or synaptically connected pairs of neurons recorded ( $n$ ) and number of mice used ( $N$ ) are indicated in the figure legends and in the supplementary tables. Summary plots with individual data points are included in every figure in order to illustrate results obtained from single neurons and corresponding population data. This allows visual control of variability, outliers and the actual number of neurons recorded.

**Statistical reporting**

- Statistical analysis methods should be described and justified
- Raw data should be presented in figures whenever informative to do so (typically when N per group is less than 10)
- For each experiment, you should identify the statistical tests used, exact values of N, definitions of center, methods of multiple test correction, and dispersion and precision measures (e.g., mean, median, SD, SEM, confidence intervals; and, for the major substantive results, a measure of effect size (e.g., Pearson's  $r$ , Cohen's  $d$ ))
- Report exact p-values wherever possible alongside the summary statistics and 95% confidence intervals. These should be reported for all key questions and not only when the p-value is less than 0.05.

Please outline where this information can be found within the submission (e.g., sections or figure legends), or explain why this information doesn't apply to your submission:

Statistical analyses and tests used are explained in the 'Statistical analysis' subsection of the Methods section. All data were subject to statistical tests to decide whether parametric or nonparametric tests should be applied. Raw data are presented for most figures when possible.

(For large datasets, or papers with a very large number of statistical tests, you may upload a single table file with tests, Ns, etc., with reference to sections in the manuscript.)

**Group allocation**

- Indicate how samples were allocated into experimental groups (in the case of clinical studies, please specify allocation to treatment method); if randomization was used, please also state if restricted randomization was applied
- Indicate if masking was used during group allocation, data collection and/or data analysis

Please outline where this information can be found within the submission (e.g., sections or figure legends), or explain why this information doesn't apply to your submission:

Both, male and female, Eu and Ts mice were allocated randomly in each experimental group. This is stated in the 'Statistical tests' subsection of the Methods section. The genotype of the animals was unknown to the experimenter at the time of data acquisition and data analysis.

**Additional data files ("source data")**

- We encourage you to upload relevant additional data files, such as numerical data that are represented as a graph in a figure, or as a summary table
- Where provided, these should be in the most useful format, and they can be uploaded as "Source data" files linked to a main figure or table

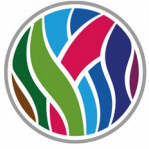

eLIFE

1st Floor  
24 Hills Road  
Cambridge CB2 1JP, UK

P 01223 855340  
W [elifesciences.org](http://elifesciences.org)  
T @elife

- Include model definition files including the full list of parameters used
- Include code used for data analysis (e.g., R, MatLab)
- Avoid stating that data files are “available upon request”

Please indicate the figures or tables for which source data files have been provided:

Source data files are provided for each figure.
